# Supplementary material
Source: Springer Nature journal article supplement (https://www.springermedizin.de/resource/supplementary/12889_2008_1535_MOESM4_ESM.pdf/9503368)

**A.**

### Patient opinions of 28 day prescribing

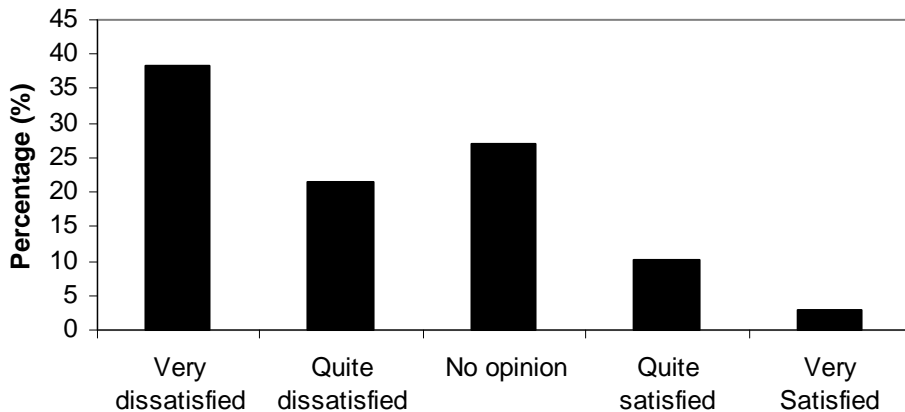**B.**

### Reason for dissatisfaction with 28 day prescribing

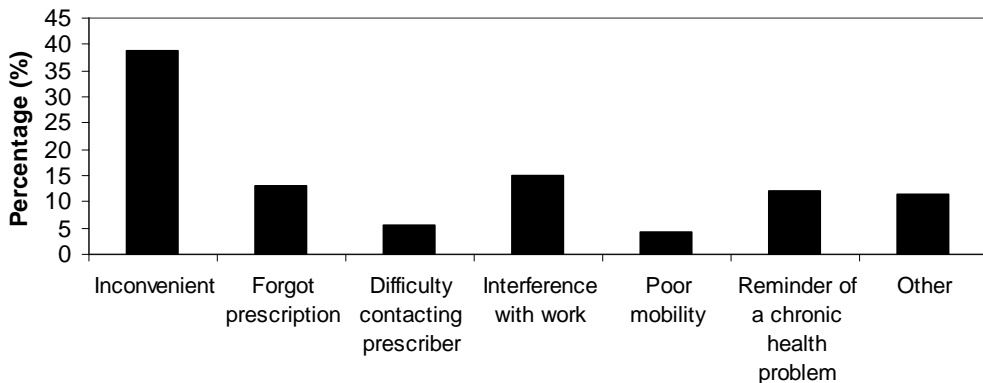

Supplement: MOESM4 [file 9503368]
